# Supplementary material
Source: PubMed Central journal article supplement (PMC1518690)
Supplement: pmed.0030228.sd007.pdf [file pmed.0030228.sd007.pdf]

*File - China* *Mr. P. M. Adams*

**BRIEFING NOTE** *Marketing* **P.A.**

**PHILIP MORRIS IN CHINA**

**28 AUG 1992**

COMPANY SHARE

• BAT, the leading foreign cigarette Company in China is 3 times the size of PM, No. 2 in the market. In 1992, BAT's dominant share, estimated at 54.3% of total cigarette imports, relates to that of PM of 16.6%.

• In 1991 and, more particularly, 1992 BAT has significantly outperformed PM in share growth. In 1991, BAT's share grew 3.9 share points (to 49.0% of share) compared to PM's 2.4 share points (to 17.2%) in the imported segment. On the back of a strong performance by 555, BAT's share growth in 1992 is expected to further outstrip PM's performance, increasing by 5.3 share points to 54.3%. In 1992, due mainly to a softness in Marlboro, PM's share is expected to decline by 0.6 share points to 16.6%.

BRAND PERFORMANCE

• While a portfolio of three major brands (555, KENT, and HILTON) contribute to BAT's dominance in China, Philip Morris' business is heavily dependent on Marlboro, which brand accounts for 89% of total PM volume.

• As a result of continuing strong growth in 1992, 555 has now become the No.2 imported brand with a share of imports of 14.9% for the year to date to July, compared to Marlboro which will have eased to a share of 13.5% for the same period. Hilton remains the market leader in the imported segment growing to an estimated 26.2% for the YTD.

PRICING

• In the China market 555 has consistently been able to retain a premium retail price to Marlboro and, therefore, more prestige.

• There was a shortening of supply of PM's brands to the market in the first half of 1992. It remains to be seen whether this has been a deliberate strategy following PM's increased sensitivity to exports having been chastised by the CNTC for supply irregularities or whether it has been the result of stock mismanagement. As a result, the price of Marlboro KS box (not the soft cup) showed an increase in the period of shortage to the premium level of that of 555 HKDNP stock, although the brand as a whole lost share. However, with the resumption of increased supply Marlboro's price is showing signs of slowly dropping back to its lower level.

SALES BY CHANNEL

• As CNTC outlets act as a showcase to Chinese smokers, BAT has ensured that 555's price is positioned at the premium end and above the free market price. This deliberate strategy is designed to enhance performance in the free market where the volume is significant. PM adopt a different approach, whereby Marlboro positioned in price both well below 555s price and below the free market price, has achieved brand leadership in the channel. Despite this, with three key brands BAT will still sell half as much again as PM, with a corporate share estimated at 27% in 1992 (compared to 18.8% for PM).

500014974

- Marlboro is also the largest selling brand in China Duty Free outlets (border shops, etc.) because of the brand's popularity outside China (e.g. Hong Kong).

#### COMMUNICATION SPEND AND AWARENESS

- Although BAT significantly increased communication spend in 1992, it is estimated that Philip Morris still spends as much behind Marlboro (more than US\$20 million) as BAT for its four major brands (555, Kent, Lucky Strike and Hilton).
- With heavy support behind its global "Cowboy" campaign, PM has been able to achieve more awareness of Marlboro advertising than BAT for 555 and Kent (e.g. 88% for Marlboro in Guangzhou compared to 42% for 555 and 36% for Kent). Whilst advertising awareness for 555 has recently increased through outdoor and P.O.S. activities, with the introduction of the new international campaign, a further increase in advertising awareness may be anticipated.
- BAT's communications spend, although focussing on above-the-line, attach more weight than PM to outdoor and P.O.S. signages. As a result, 555 has a more competitive outdoor presence than Marlboro, the spend for which PM totally concentrate on electronic media.

#### ORGANISATION STRUCTURE

- A Philip Morris vice-president (W.S. Wong), based in Hong Kong, runs both the China domestic (CNTC and duty-free) and export businesses (as well as Taiwan). Wong reports to Bill Webb in Hong Kong.
- Philip Morris China Division has five sales offices in China and a small marketing department in Hong Kong. Both sales and marketing functions look after the domestic (CNTC and duty-free) business only. Philip Morris also has a regional marketing services department (also based in Hong Kong) to provide marketing support to all markets in the Asian region.

Information on performance, pricing and organisation structure are attached.

F. Chong  
28 August 1992

500014975

SALES & SHARES

|                   | EST. 1992 |       | 1991  |       | 1990  |       |
|-------------------|-----------|-------|-------|-------|-------|-------|
|                   | Mn.       | %     | Mn.   | %     | Mn.   | %     |
| << TOTAL CHINA >> |           |       |       |       |       |       |
| B.A.T.            |           |       |       |       |       |       |
| SE355             | 10942     | 16.3  | 8068  | 12.8  | 4571  | 10.5  |
| KENT              | 5747      | 8.6   | 5652  | 9.0   | 4877  | 11.2  |
| HILTON            | 18145     | 24.0  | 13894 | 22.0  | 9679  | 22.2  |
| Others            | 3690      | 5.5   | 5310  | 5.2   | 519   | 1.2   |
| TOTAL B.A.T.      | 36514     | 54.34 | 30924 | 49.0  | 19646 | 45.1  |
| P.M.I.            |           |       |       |       |       |       |
| MARLBORO          | 9842      | 14.8  | 9720  | 15.4  | 5913  | 12.6  |
| PARLIAMENT        | 222       | 0.3   | 98    | 0.2   | 78    | 0.2   |
| MONTEREY          | 645       | 1.0   | 925   | 1.5   | 330   | 0.8   |
| Others            | 543       | 0.5   | 139   | 0.2   | 130   | 0.3   |
| TOTAL P.M.I.      | 11152     | 16.6  | 10883 | 17.2  | 6451  | 14.8  |
| TOTAL CHINA       | 67200     | 100.0 | 63100 | 100.0 | 43538 | 100.0 |

21 08 92

500014976

SALES & SHARES

| <<EXPORT>>   | EST. 1992 |       | 1991  |       | 1990  |       | XIAMEN: CNTC       |      | EST. 1992 |      | 1991  |      | 1990  |   |
|--------------|-----------|-------|-------|-------|-------|-------|--------------------|------|-----------|------|-------|------|-------|---|
|              | Mn.       | %     | Mn.   | %     | Mn.   | %     | Mn.                | %    | Mn.       | %    | Mn.   | %    | Mn.   | % |
| B.A.I.       | 8672      | 15.3  | 6183  | 11.6  | 3085  | 8.8   | B.A.I.             | 600  | 50.0      | 600  | 50.0  | 438  | 32.0  |   |
| SE555        | 5345      | 9.4   | 5216  | 9.7   | 4127  | 11.8  | SE555              | 600  | 50.0      | 600  | 50.0  | 321  | 23.0  |   |
| KENT         | 15300     | 26.9  | 12836 | 24.0  | 8303  | 23.7  | KENT               | 600  | 50.0      | 600  | 50.0  | 609  | 45.0  |   |
| HILTON       | 3074      | 5.4   | 2820  | 5.3   | 259   | 0.7   | HILTON             | 1200 | 100.0     | 1200 | 100.0 | 366  | 100.0 |   |
| Others       |           |       |       |       |       |       | Others             |      |           |      |       |      |       |   |
| TOTAL B.A.I. | 32393     | 57.0  | 27055 | 50.8  | 15774 | 45.0  | TOTAL B.A.I.       | 1200 | 100.0     | 1200 | 100.0 | 1366 | 100.0 |   |
| P.M.I.       | 7672      | 13.5  | 7540  | 14.1  | 3965  | 11.3  | P.M.I.             | -    | -         | -    | -     | -    | -     |   |
| MARLBORO     | 114       | 0.2   | 44    | 0.1   | 78    | 0.2   | MARLBORO           | -    | -         | -    | -     | -    | -     |   |
| PARLIAMENT   | 625       | 1.1   | 900   | 1.7   | 301   | 0.9   | PARLIAMENT         | -    | -         | -    | -     | -    | -     |   |
| MONTEREY     | 341       | 0.6   | 135   | 0.2   | 130   | 0.4   | MONTEREY           | -    | -         | -    | -     | -    | -     |   |
| Others       |           |       |       |       |       |       | Others             | -    | -         | -    | -     | -    | -     |   |
| TOTAL P.M.I. | 8752      | 15.4  | 8619  | 16.1  | 4474  | 12.8  | TOTAL P.M.I.       | -    | -         | -    | -     | -    | -     |   |
| TOTAL EXPORT | 56830     | 100.0 | 53430 | 100.0 | 35051 | 100.0 | TOTAL X/MC/NTG/SEZ | 1200 | 100.0     | 1200 | 100.0 | 1366 | 100.0 |   |

21.08.92

500014977

SALES & SHARES

| << CNTC >>   | EST. 1992 |       | 1991 |       | 1990 |       | << DUTY FREE >> |      | EST 1992 |      | 1991  |      | 1990  |   |
|--------------|-----------|-------|------|-------|------|-------|-----------------|------|----------|------|-------|------|-------|---|
|              | Mn.       | %     | Mn.  | %     | Mn.  | %     | Mn.             | %    | Mn.      | %    | Mn.   | %    | Mn.   | % |
| B.A.T.       |           |       |      |       |      |       |                 |      |          |      |       |      |       |   |
| SE555        | 686       | 13.0  | 429  | 9.3   | 240  | 8.4   | B.A.T.          | 383  | 25.2     | 856  | 22.1  | 810  | 19.0  |   |
| KENT         | 120       | 2.3   | 157  | 3.4   | 120  | 4.2   | SE555           | 282  | 7.2      | 279  | 7.2   | 309  | 7.2   |   |
| HILTON       | 103       | 1.9   | 200  | 4.4   | 218  | 7.7   | KENT            | 142  | 3.6      | 258  | 6.6   | 549  | 12.9  |   |
| Others       | 516       | 9.8   | 408  | 8.9   | 169  | 5.9   | HILTON          | 90   | 2.4      | 82   | 2.1   | 91   | 2.1   |   |
| TOTAL B.A.T. | 1424      | 27.0  | 1194 | 26.0  | 747  | 26.2  | Others          | 1467 | 38.4     | 1475 | 38.0  | 1759 | 41.2  |   |
|              |           |       |      |       |      |       | TOTAL B.A.T.    |      |          |      |       |      |       |   |
| P.M.I.       |           |       |      |       |      |       |                 |      |          |      |       |      |       |   |
| MARLBORO     | 870       | 16.5  | 780  | 17.0  | 498  | 17.5  | P.M.I.          | 1400 | 35.9     | 1400 | 36.1  | 1450 | 34.0  |   |
| PARLIAMENT   | 100       | 1.9   | 53   | 1.1   | -    | -     | MARLBORO        | 8    | 0.2      | 2    | 0.1   | -    | -     |   |
| MONTEREY     | 20        | 0.4   | 23   | 0.5   | 29   | 1.0   | PARLIAMENT      | -    | -        | 2    | 0.1   | -    | -     |   |
| Others       | -         | -     | -    | -     | -    | -     | MONTEREY        | 2    | D.1      | 4    | C.1   | -    | -     |   |
| TOTAL P.M.I. | 990       | 18.8  | 856  | 18.6  | 527  | 18.5  | Others          | 440  | 36.2     | 1403 | 36.3  | 1450 | 34.0  |   |
| TOTAL CNTC   | 5270      | 100.0 | 4590 | 100.0 | 2851 | 100.0 | TOTAL P.M.I.    | 3900 | 100.0    | 3380 | 100.0 | 4270 | 100.0 |   |

21.08.1992

876710005

RETAIL PRICE PER 200'S

|                 | 1992            |      | 1991        |      | 1990              |      | 1992        |      | 1991              |      | 1990              |      | 1992   |      | 1991 |      | 1990 |      |      |      |
|-----------------|-----------------|------|-------------|------|-------------------|------|-------------|------|-------------------|------|-------------------|------|--------|------|------|------|------|------|------|------|
|                 | HK\$            |      | HK\$        |      | HK\$              |      | FEC         |      | FEC               |      | FEC               |      | RMB    |      | RMB  |      | RMB  |      |      |      |
|                 | << DUTY FREE >> |      | << CNITC >> |      | << FREE MARKET >> |      | << CNITC >> |      | << FREE MARKET >> |      | << FREE MARKET >> |      | AUG'92 |      | 1991 |      | 1990 |      |      |      |
|                 | 1992            | 1991 | 1992        | 1991 | 1992              | 1991 | 1992        | 1991 | 1992              | 1991 | 1990              | 1992 | 1991   | 1990 | 1992 | 1991 | 1990 | 1992 | 1991 | 1990 |
| B.A.T.          |                 |      |             |      |                   |      |             |      |                   |      |                   |      |        |      |      |      |      |      |      |      |
| SE555 K         | 70              | 70   | 70          | 65   | 68                | 66   | 60          | 60   | 65                | 60   | 70                | 66   | 66     | 60   | 65   | 50   | 50   | 70   | 50   | 70   |
| KENT K SC       | 70              | 70   | 70          | 65   | 57                | 57   | 54          | 54   | 53                | 54   | 55                | 57   | 57     | 55   | 53   | 49   | 49   | 55   | 50   | 55   |
| KENT K BOX      | 75              | 75   | 75          | 70   | 57                | 57   | -           | -    | 53                | 50   | 58                | 57   | 57     | -    | 50   | 50   | -    | 58   | 50   | -    |
| KENT DL SC      | 75              | 75   | 75          | 70   | 59                | 59   | 55          | 55   | 50                | 48   | 58                | 59   | 59     | 55   | 50   | 48   | -    | 58   | 50   | 58   |
| KENT DL BOX     | 75              | 75   | 75          | 70   | 59                | 59   | -           | -    | 51                | -    | 44                | 59   | 59     | -    | 51   | -    | -    | 44   | -    | 44   |
| HILTON K        | 40              | 40   | 40          | 35   | 38                | 38   | 36          | 36   | 34                | 31   | 44                | 38   | 38     | 36   | 34   | 31   | 31   | 44   | 31   | 44   |
| HILTON SL       | 45              | 45   | 45          | 40   | 40                | 40   | 38          | 38   | 34                | 32   | 44                | 40   | 40     | 38   | 34   | 32   | 32   | 44   | 32   | 44   |
| P.M.L.          |                 |      |             |      |                   |      |             |      |                   |      |                   |      |        |      |      |      |      |      |      |      |
| MARLBORO K      | 70              | 70   | 70          | 65   | 57                | 57   | 54          | 54   | 64                | 58   | 59                | 57   | 57     | 54   | 64   | 58   | 58   | 59   | 58   | 59   |
| MARLBORO K BOX  | 70              | 70   | 70          | 65   | 57                | 57   | -           | -    | 69                | -    | 56                | 57   | 57     | -    | 69   | -    | -    | 56   | -    | 56   |
| MARLBORO 100S   | 75              | 75   | 75          | 70   | 59                | 59   | 55          | 55   | 59                | 55   | 56                | 59   | 59     | 55   | 59   | 55   | -    | 56   | -    | 56   |
| PARLIAMENT 100S | 75              | 75   | 75          | 70   | 59                | 59   | 55          | 55   | 59                | 55   | 56                | 59   | 59     | 55   | 59   | 55   | -    | 56   | -    | 56   |
| MONTEREY 100S   | 40              | 40   | 40          | 40   | 36                | 36   | 33          | 33   | 27                | 27   | 38                | 36   | 36     | 33   | 27   | 27   | -    | 38   | -    | 38   |

20.08 1992

500011979

LIST PRICE (HK\$/CASE)

|                 | 1992 | 1991 | 1990 |                 | 1992 | 1991 | 1990 |
|-----------------|------|------|------|-----------------|------|------|------|
| << DUTY FREE >> |      |      |      | << CNTC >>      |      |      |      |
| B.A.T.          |      |      |      | B.A.T.          |      |      |      |
| SE555 K         | 2200 | 2050 | 1900 | SE555 K         | 1500 | 1500 | 1500 |
| KENT K SC       | 2050 | 2050 | 1900 | KENT K SC       | 1300 | 1300 | 1300 |
| KENT K BOX      | 2050 | 2050 | -    | KENT K BOX      | 1300 | 1300 | -    |
| KENT DL SC      | 2100 | 2100 | 1950 | KENT D. SC      | 1350 | 1350 | 1350 |
| KENT DL BOX     | 2100 | -    | -    | KENT DL BOX     | 1350 | -    | -    |
| HILTON K        | 1000 | 1000 | 950  | HILTON K        | 850  | 850  | 850  |
| HILTON SL       | 1050 | 1050 | 960  | HILTON SL       | 900  | 900  | 900  |
|                 |      |      |      |                 |      |      |      |
| F.M.I.          |      |      |      | F.M.I.          |      |      |      |
| MARLBORO K      | 2050 | 2050 | 1900 | MARLBORO K      | 1300 | 1300 | 1300 |
| MARLBORO K BOX  | 2050 | 2050 | -    | MARLBORO K BOX  | 1300 | 1300 | -    |
| MARLBORO 100S   | 2100 | 2100 | 950  | MARLBORO 100S   | 1350 | 1350 | 1350 |
| PARLIAMENT 100S | 2100 | 2100 | 1950 | PARLIAMENT 100S | 1350 | 1350 | 1350 |
| MONTEREY 100S   | 950  | 950  | -    | MONTEREY 100S   | 850  | 850  | 950  |
|                 |      |      |      |                 |      |      |      |
| XTAMEN: CNTC    |      |      |      | << EXPORT >>    |      |      |      |
| B.A.T.          |      |      |      | B.A.T.          |      |      |      |
| SE555 K         | 1950 | 1850 | 1850 | SE555 K         | 2050 | 1950 | 1950 |
| KENT K SC       | -    | -    | -    | KENT K SC       | 1700 | 1800 | 1800 |
| KENT K BOX      | -    | -    | -    | KENT K BOX      | 1700 | 1800 | -    |
| KENT DL SC      | -    | -    | 1550 | KENT DL SC      | 1700 | 1850 | 1850 |
| KENT DL BOX     | -    | -    | -    | KENT DL BOX     | 1700 | -    | -    |
| HILTON K        | -    | -    | -    | HILTON K        | 950  | 950  | 950  |
| HILTON SL       | 1020 | 1000 | 1000 | HILTON SL       | 1000 | 1000 | 1000 |
|                 |      |      |      |                 |      |      |      |
| P.M.I.          |      |      |      | P.M.I.          |      |      |      |
| MARLBORO K      | -    | -    | -    | MARLBORO K      | 1950 | 1850 | 800  |
| MARLBORO K BOX  | -    | -    | -    | MARLBORO K BOX  | 1950 | 1850 | -    |
| MARLBORO 100S   | -    | -    | -    | MARLBORO 100S   | 1950 | 1850 | 1800 |
| PARLIAMENT 100S | -    | -    | -    | PARLIAMENT 100S | 1950 | 1850 | 1800 |
| MONTEREY 100S   | -    | -    | -    | MONTEREY 100S   | 750  | 750  | 750  |

21.08.92

500014980

PHILIP MORRIS ASIA INC. - CHINA DIVISION

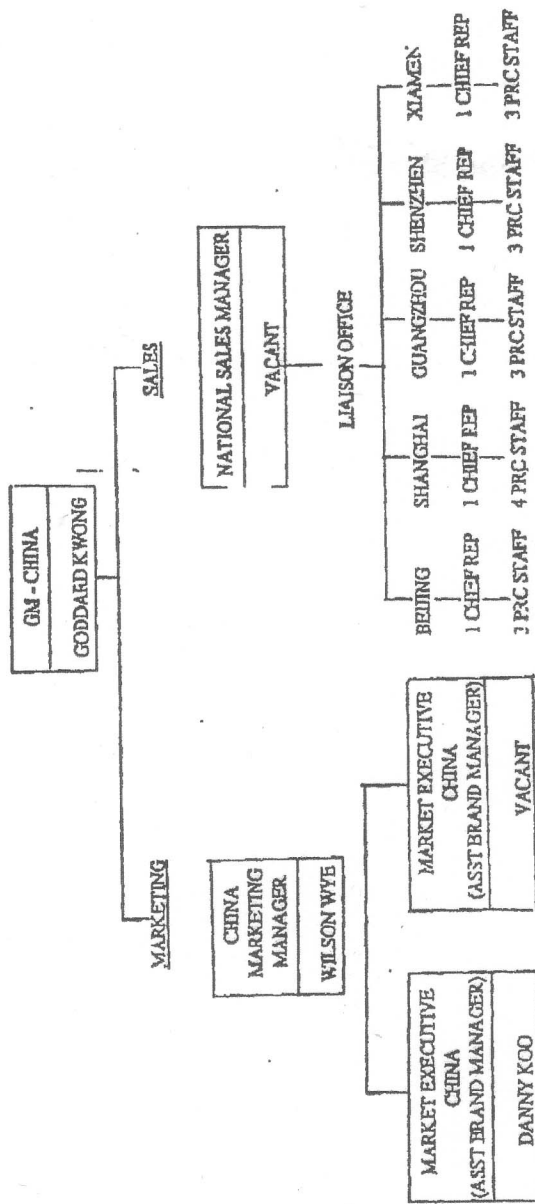

AUGUST 26, 1992

500014981



PHILIP MORRIS ASIA INC.

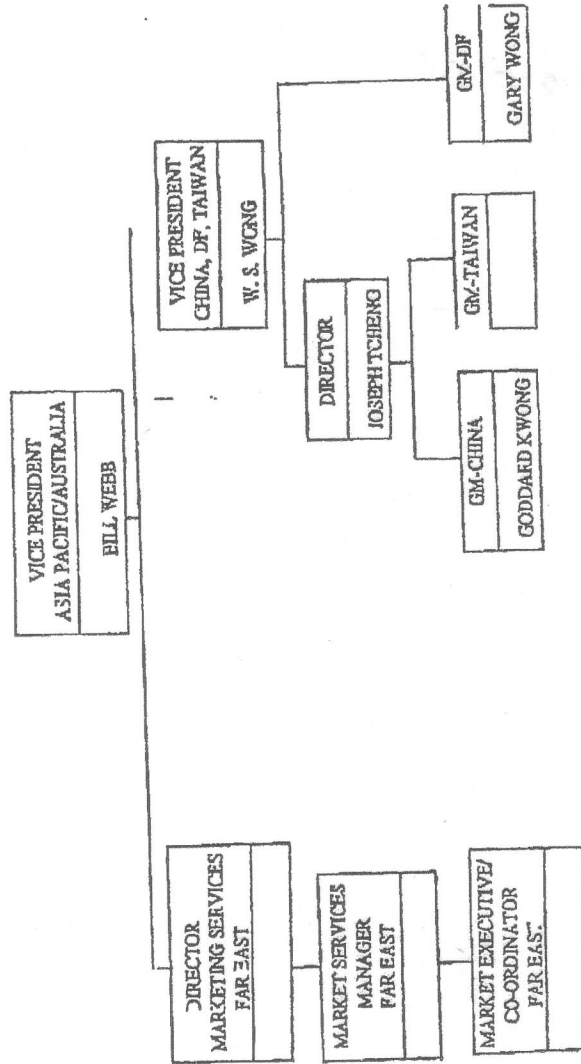

N.B. PMI RELY HEAVILY ON LEO BURNETT FOR MARKETING INPUT, PARTICULARLY SPEND PROPOSALS A-T-L, E-T-L

AUGUST 20, 1992

500014982
